# Supplementary material
Source: publisher figshare collection journal article supplement (https://acs.figshare.com/ndownloader/files/4664287)
Supplement: Supplementary file 1 [file 4664287]

# Inherent Photoluminescence Properties of Poly(Propyl Ether Imine)

## Dendrimers

G. Jayamurugan, C. P. Umesh and N. Jayaraman\*

*Department of Organic Chemistry, Indian Institute of Science, Bangalore 560 012, India*

[jayaraman@orgchem.iisc.ernet.in](mailto:jayaraman@orgchem.iisc.ernet.in)

---

## Supplementary Information

**Methods:** Absorption and fluorescence spectra were recorded using quartz cell with a path length of 1 cm. Absorption spectra were recorded on a Perkin-Elmer lambda 35 spectrophotometer at a scan rate of 120 nm/ min and a width of 2 nm. The absorption data were blank corrected with absorption of the solvent. Fluorescence spectra were recorded on a Shimadzu RF-540 spectrofluorophotometer. Distilled deionized water (Millipore filtration system) was used for the experiments. Fluorescence lifetime spectrophotometer (Model 5000 U, IBH, UK) with a Time Correlated Single Photon Counting technique (TCSPC) and microchannel plate photomultiplier tube (MCP-PMT) as detector was used to conduct the lifetime measurements. A picosecond laser was used as the excitation source. The excitation wavelength is 267 nm, which was produced by using third harmonic laser and the emission decay was monitored at the wavelength of 390 nm. Fluorescence quenching studies were performed using aqueous **G5** (0.1 mM) solution, titrated with a sample of the quenchers in water.

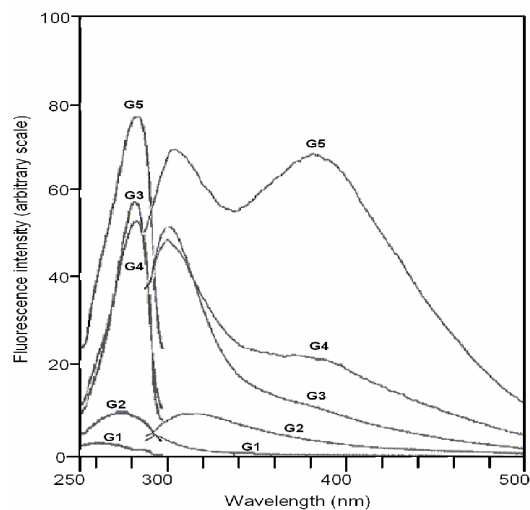

**Figure 1.** Emission and excitation spectra of methanolic solutions of PETIM dendrimer generations at  $\lambda_{\text{ex}} = 273 \text{ nm}$ .  $[\text{G1}]\text{--}[\text{G3}] = 0.5 \text{ mM}$ ;  $[\text{G4}] = 0.25 \text{ mM}$ ;  $[\text{G5}] = 0.125 \text{ mM}$ .

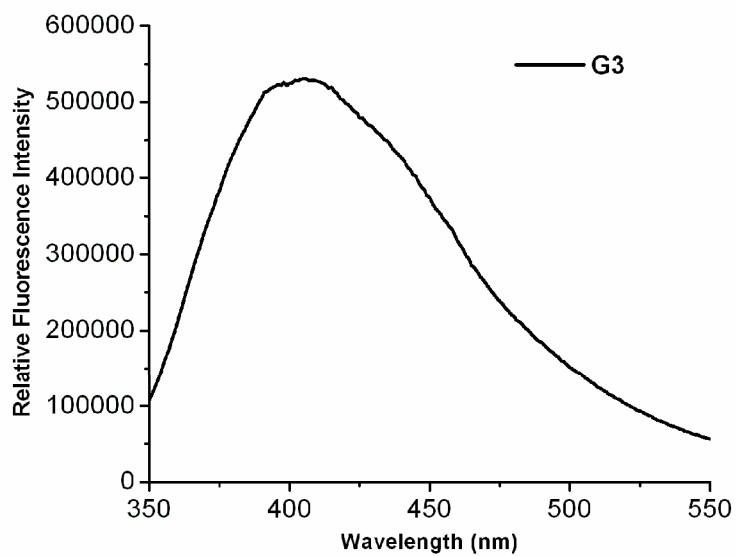

**Figure 2.** Thin film emission spectrum of **G3** ( $\lambda_{\text{ex}} = 330 \text{ nm}$ ).

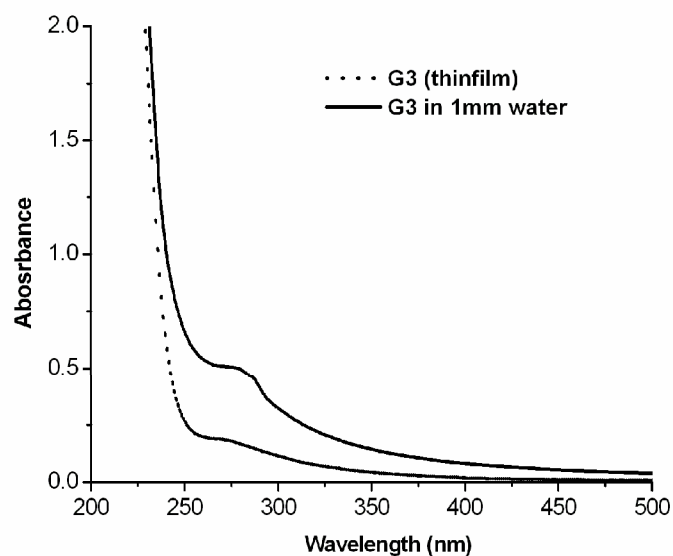

**Figure 3.** Thin film and solution absorption spectrum.

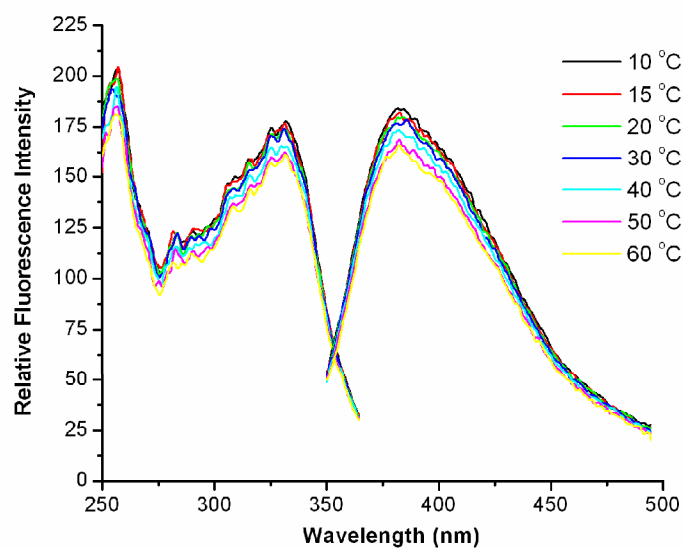

**Figure 4.** Variable temperature excitation and emission spectra of an aqueous solution of the **G4** dendrimer (0.5 mM).

**Day 0**

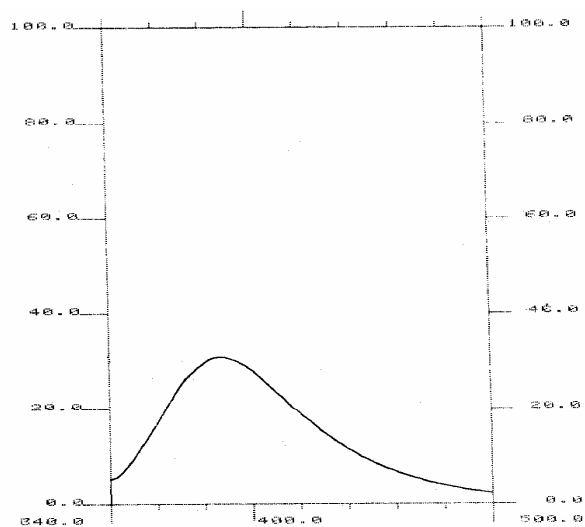

**Day 24**

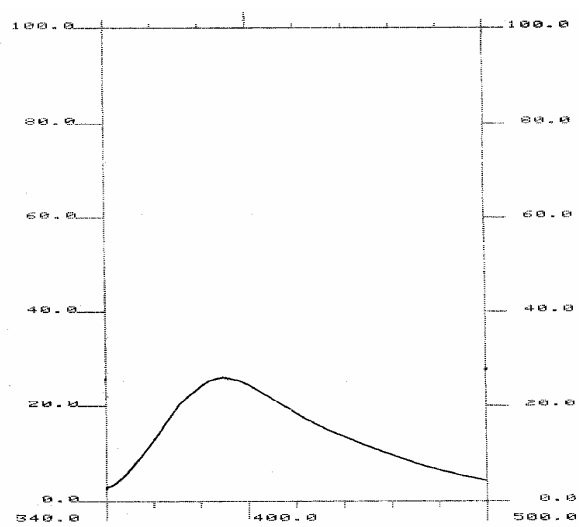

**Day 45**

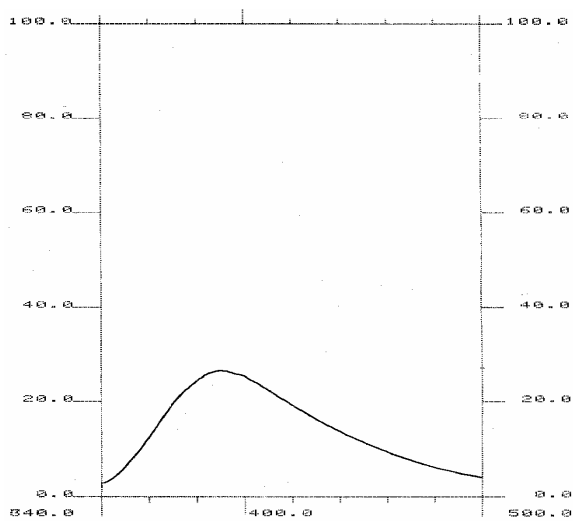

**Relative fluorescence intensity vs number of days**

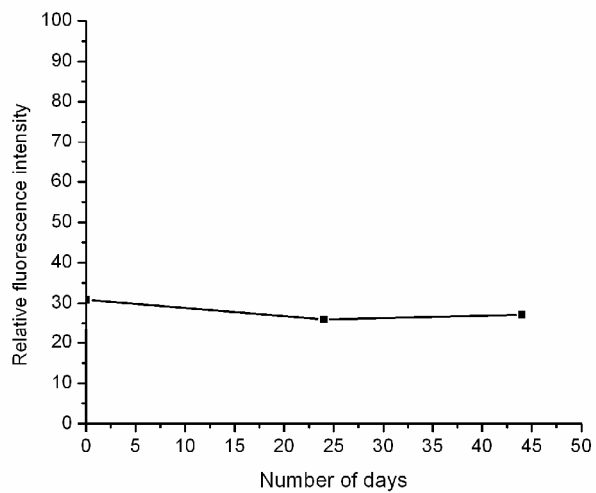

**Figure 5.** Emission spectra of an aqueous solution of **G4** dendrimer (0.7 mM), purged with nitrogen and kept at 50 °C, measured at different intervals.

**Day 0**

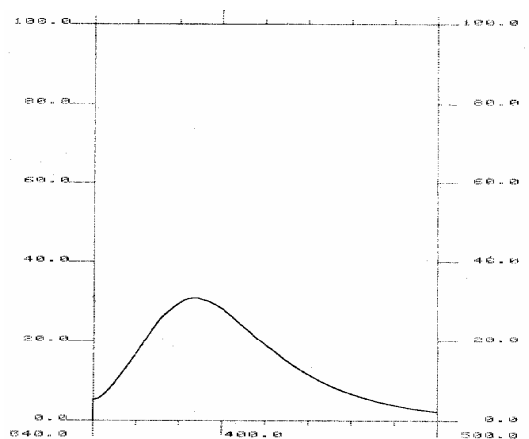

**Day 5**

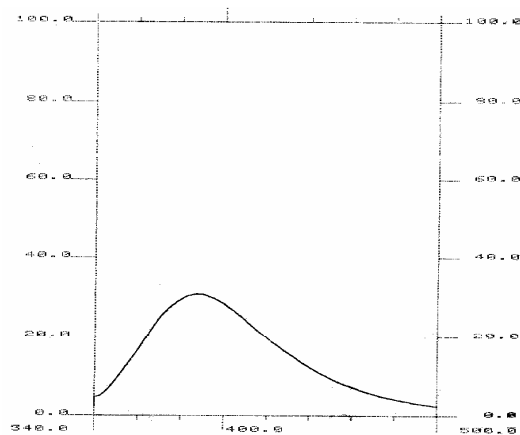

**Day 16**

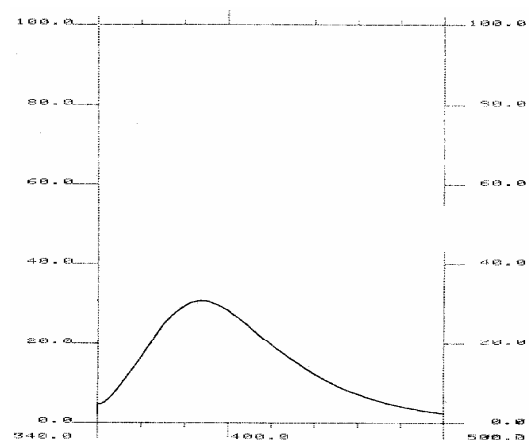

**Day 24**

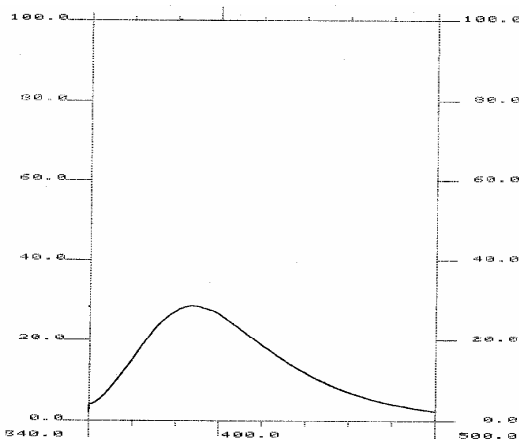

**Day 45**

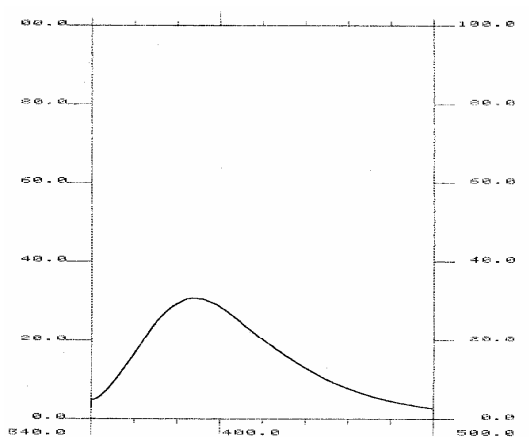

**Relative fluorescence intensity vs number of days**

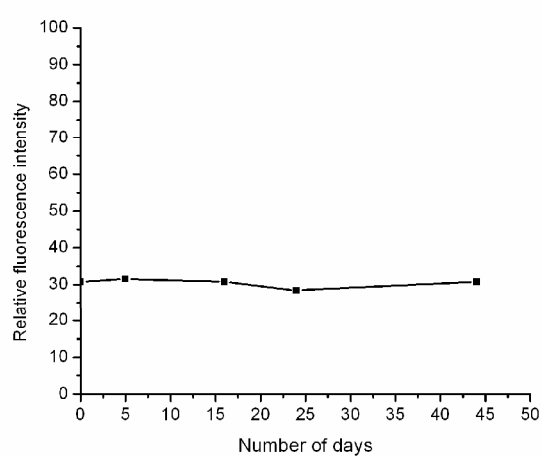

**Figure 6.** Emission spectra of an aqueous solution of **G4** dendrimer (0.7 mM), purged with air and kept at 0 °C, measured at different intervals.

**Day 0**

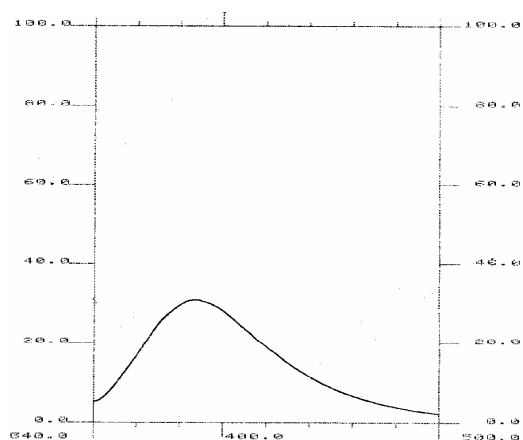

**Day 5**

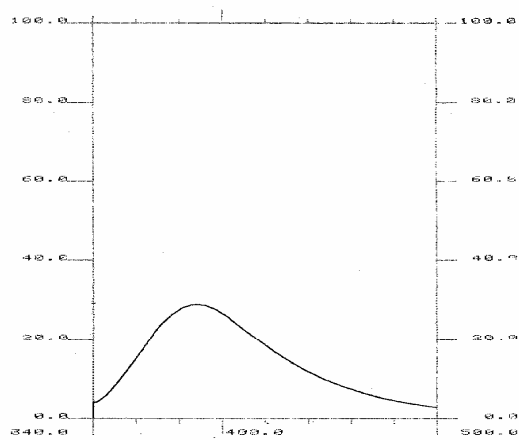

**Day 16**

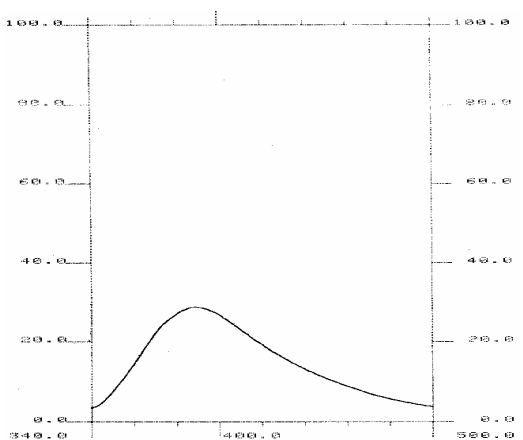

**Day 24**

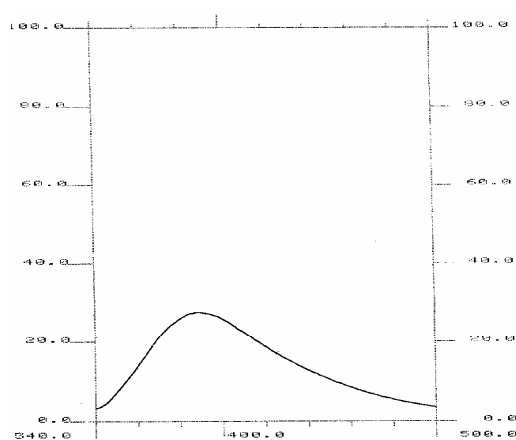

**Day 45**

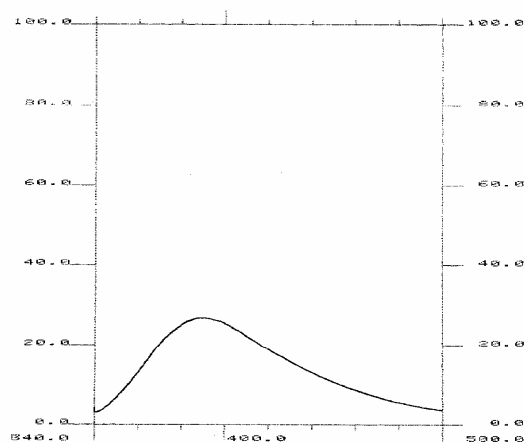

**Relative fluorescence intensity vs number of days**

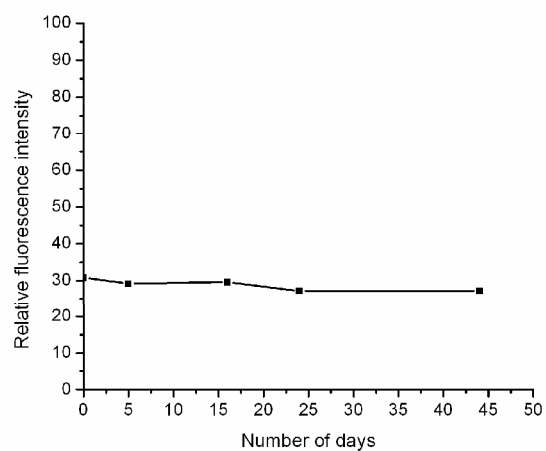

**Figure 7.** Emission spectra of an aqueous solution of **G4** dendrimer (0.7 mM), purged with air and kept at 50 °C, measured at different intervals.

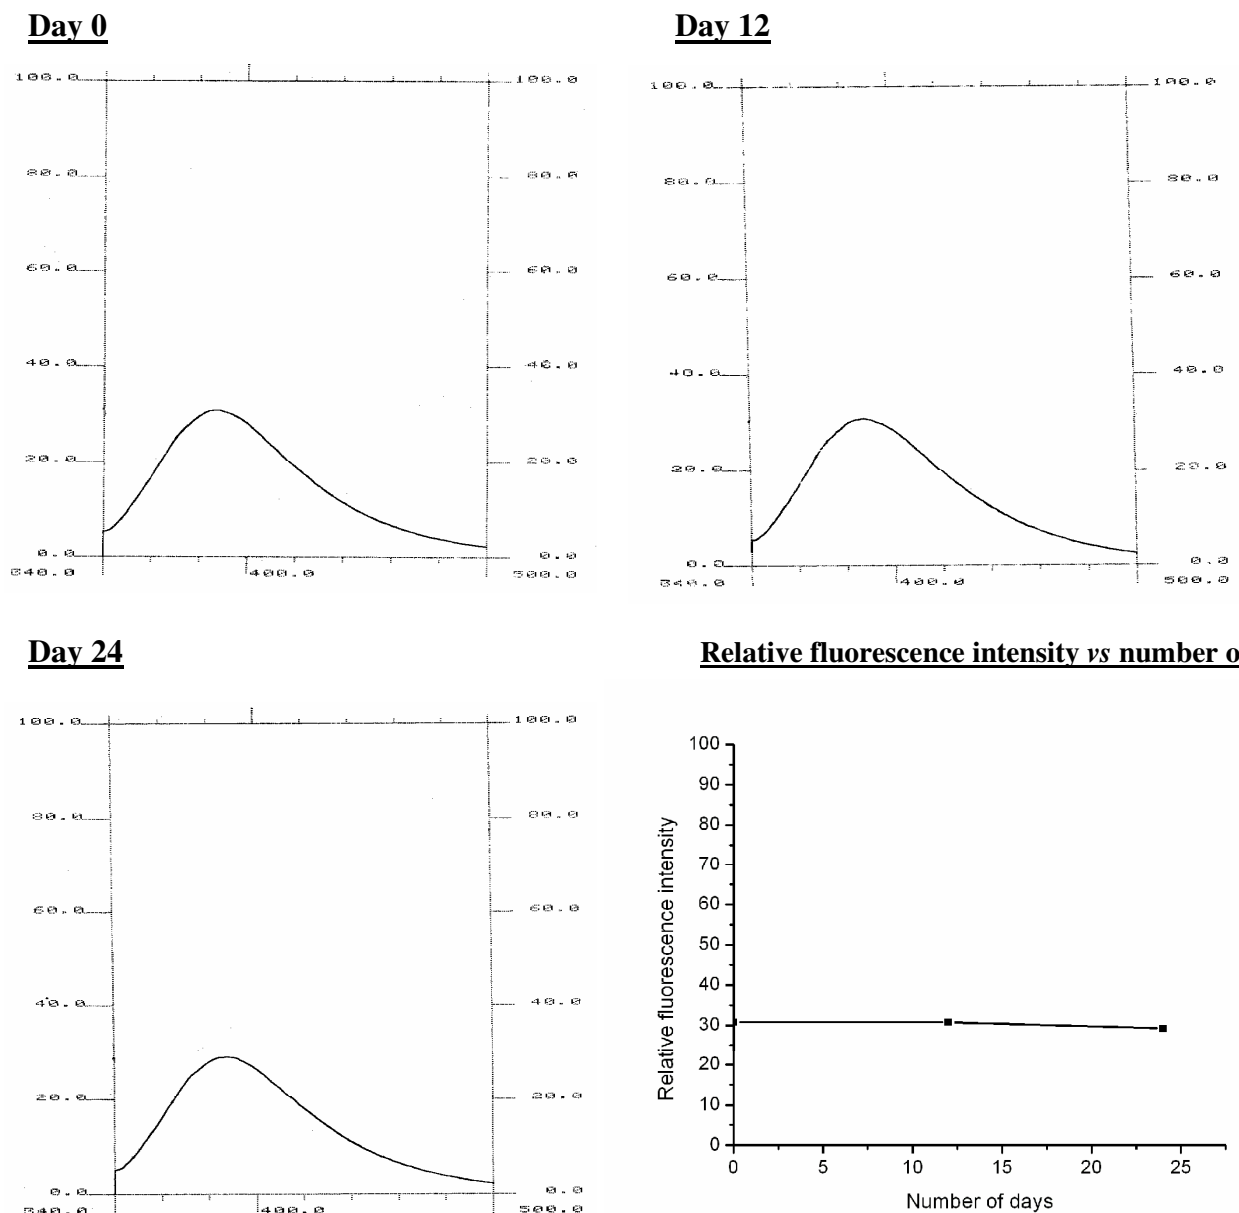

**Figure 8.** Emission spectra of an aqueous solution of **G4** dendrimer (0.7 mM), purged with air and kept at room temperature, measured at different intervals.

### Lifetime Measurements

**Fluorescence lifetime distributions for PETIM dendrimers excited at 330 nm, using a nanosecond flash lamp.**

| Sample              | $\lambda_{\text{ex}}$ | $\lambda_{\text{em}}$ | T1( $\alpha$ 1) | T2( $\alpha$ 2) | T3( $\alpha$ 3) |
|---------------------|-----------------------|-----------------------|-----------------|-----------------|-----------------|
| G4 H <sub>2</sub> O | 330 nm                | 390 nm                | 1.90 ns (0.37)  | 0.25 ns (0.17)  | 6.98 ns (0.45)  |

Fluorescence lifetime spectrophotometer (model 5000 F) with a Time Correlated Single Photon Counting technique (TCSPC) was used to conduct the life time measurements.
